# Supplementary material
Source: publisher site journal article supplement (https://www.dovepress.com/article/247114)

## Supplementary Material

**Supplementary Table 1** Differentially expressed genes (DEGs) from RNAseq data between control SKOV3-luc cells and SKOV3-luc cells treated for 72 h with cisplatin at different concentrations (10  $\mu$ M and 30  $\mu$ M) (Control vs Cis 10  $\mu$ M or 30  $\mu$ M).

**Supplementary Figure 1** (a) Dynamic light scattering diameter distribution (by number) of Cis-NP nanoparticles (dH= 70 $\pm$ 30 nm, Pdl = 0.49; PBS 1X pH 7.4, 20°C). (b) Dynamic light scattering diameter distribution (by number) of NP nanoparticles (dH= 140 $\pm$ 9 nm, Pdl = 0.33; PBS 1X pH 7.4, 20°C).

**Supplementary Figure 2** Flow cytometry data analysis: a sequential gating strategy allowed excluding dead cells based on FSC-A and SSC-A and to selected singlets based on FSC-A and FSC-H. Histograms show fluorescence intensity of Cy-5.5 within the singlet's populations.

**Supplementary Figure 3** Heat map of RNAseq expression data showing the genes that were differentially regulated following treatment with cisplatin 10  $\mu$ M or 30  $\mu$ M.

**Supplementary Figure 4** Heat map of RNAseq expression data showing the genes that were differentially regulated following treatment with cisplatin loaded NP 10  $\mu$ M or 30  $\mu$ M.

**Supplementary Figure 5** Histological analysis of tumor tissues of SKOV3-luc cells' xenografts. (a) Representative images of hematoxylin and eosin staining and immunohistochemical staining for E-cadherin, vimentin, Ki67 and Multi-Cytokeratin (MCK) of one representative tumor section of an intraperitoneal nodule from the control group of the study. (b) Representative images of hematoxylin and eosin staining of one representative tumor section at the *omentum* from the control group of the study.











|                          |                                                                     |            |       |             |       |             |                     |                            |
|--------------------------|---------------------------------------------------------------------|------------|-------|-------------|-------|-------------|---------------------|----------------------------|
| KCNJ8                    | potassium inwardly rectifying channel subfamily J member 8          | KCNJ8      | 1.6   | 1,166.09    | 3,659 | 1,276.32    | Plasma Membrane     | ion channel                |
| SDK1                     | sidelick cell adhesion molecule 1                                   | SDK1       | 1.601 | 1,366.21    | 3.25  | 6,266.73    | Plasma Membrane     | other                      |
| TMEM132B                 | transmembrane protein 132B                                          | TMEM132B   | 1.604 | 1,246.36    | 1,783 | 2,426.71    | Other               | other                      |
| LUM                      | lumican                                                             | LUM        | 1.614 | 0.000046    | 4,001 | 3,396.24    | Extracellular Space | other                      |
| CLEC19A                  | C-type lectin domain containing 19A                                 | CLEC19A    | 1.614 | 0.000033    | 6.16  | 1,796.37    | Other               | other                      |
| SCDP1                    | stearyl-CoA desaturase pseudogene 1                                 | SCDP1      | 1.618 | 0.00411     | 2,809 | 0.00000151  | Other               | other                      |
| KLHL4                    | kelch like family member 4                                          | KLHL4      | 1.637 | 1,726.17    | 3,183 | 2,426.57    | Cytoplasm           | other                      |
| CXCL12                   | C-X-C motif chemokine ligand 12                                     | CXCL12     | 1.645 | 0.000084    | 2,709 | 0.00000117  | Extracellular Space | cytokine                   |
| CAPN6                    | calpain 6                                                           | CAPN6      | 1.65  | 1,272.23    | 3,598 | 4,346.62    | Cytoplasm           | peptidase                  |
| KCTD16                   | potassium channel tetramerization domain containing 16              | KCTD16     | 1.651 | 1,485.10    | 1,562 | 6,326.22    | Plasma Membrane     | other                      |
| MPP85BP5                 | mitochondrial ribosomal protein S36 pseudogene 5                    | MPP85BP5   | 1.651 | 0.00854     | 5,181 | 0.0000146   | Other               | other                      |
| IGKV1OR-2                | immunoglobulin kappa variable 1'OR-2 (pseudogene)                   | IGKV1OR-2  | 1.663 | 7,366.12    | 1,874 | 4,986.15    | Other               | other                      |
| COL3A1                   | collagen type III alpha 1 chain                                     | COL3A1     | 1.667 | 0.00613     | 5,891 | 1,326.35    | Extracellular Space | other                      |
| CDH17                    | cadherin 17                                                         | CDH17      | 1.688 | 0.00000256  | 2,904 | 6,776.15    | Plasma Membrane     | transporter                |
| CSLN2                    | cerberin 2 precursor                                                | CSLN2      | 1.694 | 0.0000384   | 3,073 | 1,456.13    | Extracellular Space | other                      |
| TSPN17                   | telomerase 7                                                        | TSPN17     | 1.695 | 0.000189    | 6,096 | 2,716.13    | Plasma Membrane     | other                      |
| CASC18                   | cancer susceptibility 18                                            | CASC18     | 1.695 | 0.0146      | 1,391 | 0.0356      | Other               | other                      |
| MROH9                    | maestro heat like repeat family member 9                            | MROH9      | 1.695 | 0.027       | 1,842 | 0.0124      | Other               | other                      |
| SPOCK3                   | SPARC (osteonectin), ovicv and kazal like domains proteoglycan 3    | SPOCK3     | 1.696 | 6,396.10    | 2,768 | 1,556.22    | Extracellular Space | other                      |
| FREM2                    | FRAS1 related extracellular matrix 2                                | FREM2      | 1.701 | 0.0000137   | 4,742 | 1,016.23    | Extracellular Space | other                      |
| ENDK1                    | ectoderm-NOX disulfide-thiol exchanger 1                            | ENDK1      | 1.718 | 8,166.17    | 2,723 | 1,426.36    | Plasma Membrane     | other                      |
| FEB3                     | FET domain cadherin 3                                               | FEB3       | 1.718 | 6,966.23    | 3,226 | 2,556.57    | Plasma Membrane     | other                      |
| IGKV1OR-3                | immunoglobulin kappa variable 1'OR-3 (pseudogene)                   | IGKV1OR-3  | 1.719 | 1,496.10    | 2,101 | 5,256.15    | Other               | other                      |
| SLIT3                    | slit guidance ligand 3                                              | SLIT3      | 1.721 | 3,546.12    | 2,627 | 1,456.23    | Extracellular Space | other                      |
| IGKV1OR-2                | immunoglobulin kappa variable 1'OR-2 (pseudogene)                   | IGKV1OR-2  | 1.725 | 6,956.14    | 1,805 | 1,486.15    | Other               | other                      |
| miR-23                   | miR-23                                                              | MIR23A     | 1.749 | 0.0000094   | 2,725 | 6,786.10    | Cytoplasm           | microRNA                   |
| CLSTN2                   | calyculin 2                                                         | CLSTN2     | 1.766 | 0.00000234  | 1,802 | 0.00000067  | Plasma Membrane     | transporter                |
| CTNND2                   | catenin domain 2                                                    | CTNND2     | 1.768 | 3,496.29    | 3,217 | 1,466.79    | Plasma Membrane     | other                      |
| CRTRC1                   | cartilage acidic protein 1                                          | CRTRC1     | 1.769 | 0.000000221 | 2,721 | 1,866.14    | Extracellular Space | other                      |
| COL1A2                   | collagen type I alpha 2 chain                                       | COL1A2     | 1.772 | 1,396.23    | 3,003 | 1,496.64    | Extracellular Space | other                      |
| CHN2                     | chimerin 2                                                          | CHN2       | 1.78  | 9,796.10    | 3,273 | 8,886.23    | Cytoplasm           | other                      |
| SPANX1 (includes others) | SPANX family member C                                               | SPANX1     | 1.783 | 4,296.08    | 1,883 | 5,536.09    | Nucleus             | other                      |
| FAM153C                  | family with sequence similarity 153 member C                        | FAM153C    | 1.809 | 0.00103     | 3,311 | 2,846.08    | Other               | other                      |
| miR-27                   | miR-27                                                              | MIR27A     | 1.82  | 0.00000106  | 2,481 | 6,016.11    | Cytoplasm           | microRNA                   |
| GABRP                    | gamma-aminobutyric acid type A receptor $\rho 1$ subunit            | GABRP      | 1.834 | 0.00362     | 5,169 | 7,116.15    | Plasma Membrane     | ion channel                |
| ANGPT1                   | angiotensin 1                                                       | ANGPT1     | 1.85  | 0.0000635   | 3,642 | 2,036.10    | Extracellular Space | growth factor              |
| GP6A                     | glycoprotein 6A                                                     | GP6A       | 1.889 | 5,236.13    | 3,83  | 7,876.35    | Plasma Membrane     | ion channel                |
| ANK2                     | ankyrin 2                                                           | ANK2       | 1.897 | 2,916.42    | 3,615 | 9,256.109   | Plasma Membrane     | other                      |
| CHRD1                    | chordin like 1                                                      | CHRD1      | 1.898 | 0.0252      | 6,888 | 0.000000313 | Extracellular Space | other                      |
| ETK1                     | ETK transcriptional coactivator and phosphatase 1                   | ETK1       | 1.9   | 0.017       | 3,396 | 0.0000039   | Nucleus             | phosphatase                |
| LOC1957642               | uncharacterized LOC1957642                                          | AC037119.1 | 1.919 | 0.0317      | 1,652 | 0.0495      | Other               | other                      |
| NCAM2                    | neural cell adhesion molecule 2                                     | NCAM2      | 1.929 | 1,046.16    | 3,278 | 5,126.36    | Plasma Membrane     | other                      |
| FAM153A,FAM153B          | family with sequence similarity 153 member B                        | FAM153A    | 1.93  | 6,896.08    | 3,441 | 6,886.13    | Other               | other                      |
| STMN2                    | stathmin 2                                                          | STMN2      | 1.94  | 0.0242      | 1,919 | 0.0199      | Plasma Membrane     | other                      |
| PS2                      | pskectin and Sac7 domain containing 2                               | PS2        | 1.954 | 9,796.08    | 2,831 | 1,096.13    | Plasma Membrane     | other                      |
| PPP1R1AP2                | protein phosphatase 1 regulatory inhibitor subunit 1A pseudogene 2  | PPP1R1AP2  | 1.958 | 0.0237      | 3,148 | 0.0000071   | Other               | other                      |
| SOX5                     | SRY-box transcription factor 5                                      | SOX5       | 1.967 | 0.00000149  | 4,696 | 5,186.20    | Nucleus             | transcription regulator    |
| HDHD5-AS1                | HDHD5 antisense RNA 1                                               | CECR5-AS1  | 2.011 | 0.024       | 2,036 | 0.0175      | Other               | other                      |
| RPL37A                   | ribosomal protein L37 pseudogene 4                                  | RPL37A     | 2.029 | 0.03        | 2,939 | 0.00443     | Other               | other                      |
| ATP1A2                   | ATPase Na <sup>+</sup> /K <sup>+</sup> transporting subunit alpha 2 | ATP1A2     | 2.043 | 0.000000478 | 2,695 | 1,156.10    | Plasma Membrane     | transporter                |
| SDK2                     | sidelick cell adhesion molecule 2                                   | SDK2       | 2.057 | 2,146.27    | 2,84  | 6,66.44     | Plasma Membrane     | other                      |
| OR5V1                    | olfactory receptor family 5 subfamily V member 1                    | OR5V1      | 2.087 | 0.000025    | 3,858 | 0.00000294  | Plasma Membrane     | G-protein coupled receptor |
| KEL                      | Kel metallo-endopeptidase (Kel blood group)                         | KEL        | 2.117 | 0.0293      | 6,568 | 0.00000771  | Plasma Membrane     | peptidase                  |
| RNU6-2SP                 | ---                                                                 | RNU6-2SP   | 2.197 | 0.0308      | 2,245 | 0.0214      | Other               | other                      |
| RPS6P12                  | ribosomal protein S6 pseudogene 12                                  | RPS6P12    | 2.232 | 0.00226     | 1,454 | 0.0318      | Other               | other                      |
| PTPRC                    | protein tyrosine phosphatase receptor type C                        | PTPRC      | 2.265 | 0.000000291 | 2,81  | 5,256.09    | Plasma Membrane     | phosphatase                |
| CCKAR                    | cholecystokinin A receptor                                          | CCKAR      | 2.344 | 0.0054      | 1,732 | 0.0218      | Plasma Membrane     | G-protein coupled receptor |
| FAM15D                   | family with sequence similarity 15 member D                         | FAM15D     | 2.417 | 0.0366      | 2,771 | 0.017       | Extracellular Space | cytokine                   |
| TMEM200A                 | transmembrane protein 200A                                          | TMEM200A   | 2.433 | 0.0104      | 1,943 | 0.0297      | Other               | other                      |
| ZNF521                   | zinc finger protein 521                                             | ZNF521     | 2.436 | 8,006.25    | 3,879 | 3,446.45    | Nucleus             | transcription regulator    |
| OR6T1P                   | olfactory receptor family 6 subfamily T member 1 pseudogene         | OR6T1P     | 2.453 | 0.000849    | 3,772 | 0.0000475   | Other               | other                      |
| PAMR1                    | peptidase domain containing associated with muscle region PAMR1     | PAMR1      | 2.457 | 0.0000133   | 1,994 | 0.000191    | Extracellular Space | peptidase                  |
| ADGRG5                   | adhesion G-protein-coupled receptor G5                              | GPR114     | 2.477 | 0.000103    | 3,206 | 0.00000197  | Plasma Membrane     | G-protein coupled receptor |
| LINC00693                | long intergenic non-protein coding RNA 629                          | LINC00693  | 2.548 | 0.000067    | 2,723 | 0.0000274   | Other               | other                      |
| LINC00678                | long intergenic non-protein coding RNA 278                          | LINC00678  | 2.528 | 0.0207      | 2,437 | 0.0447      | Other               | other                      |

**a**

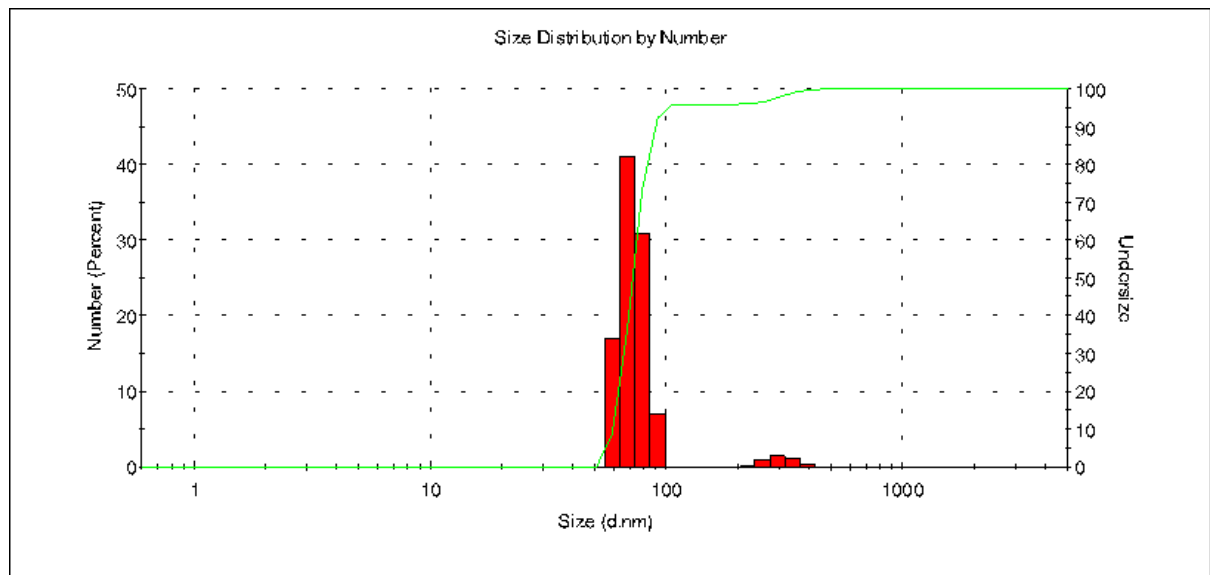

**b**

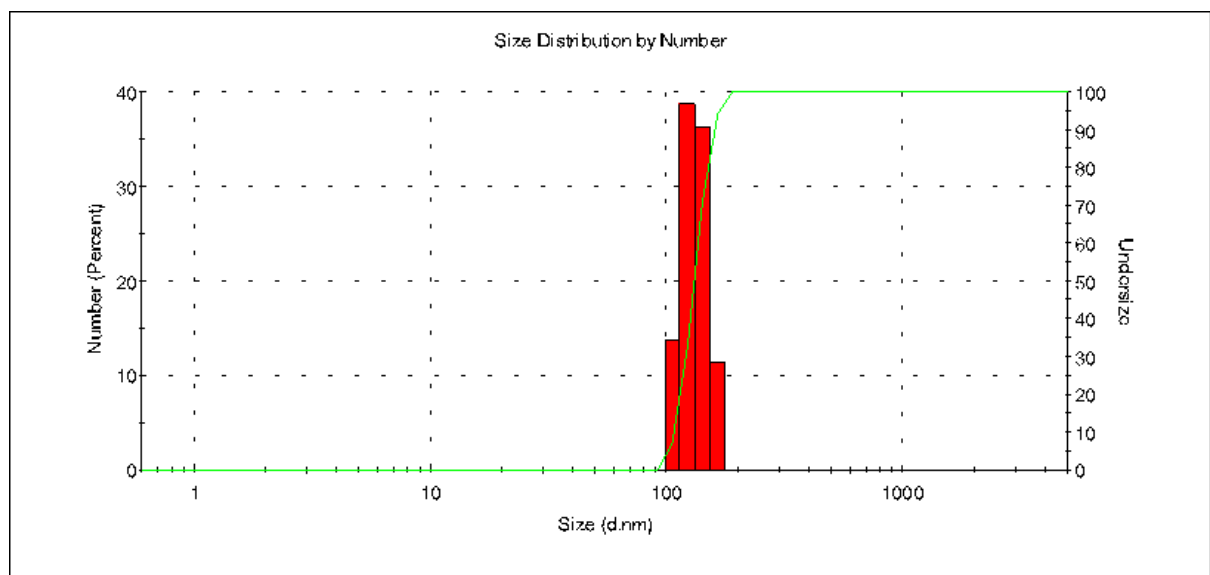

**Supplementary Figure 1**



### 3h post-treatment

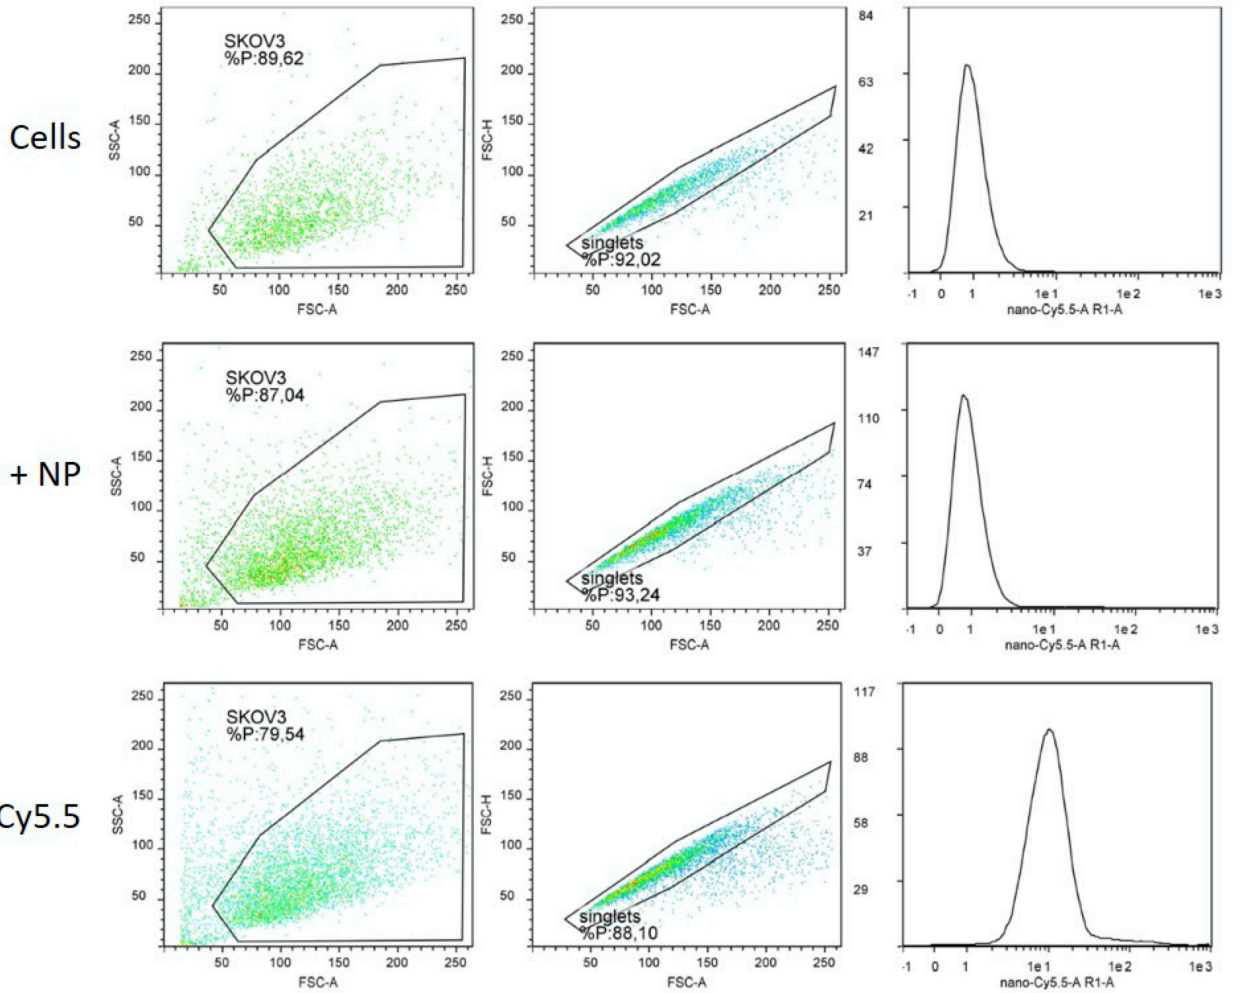

### 24h post-treatment

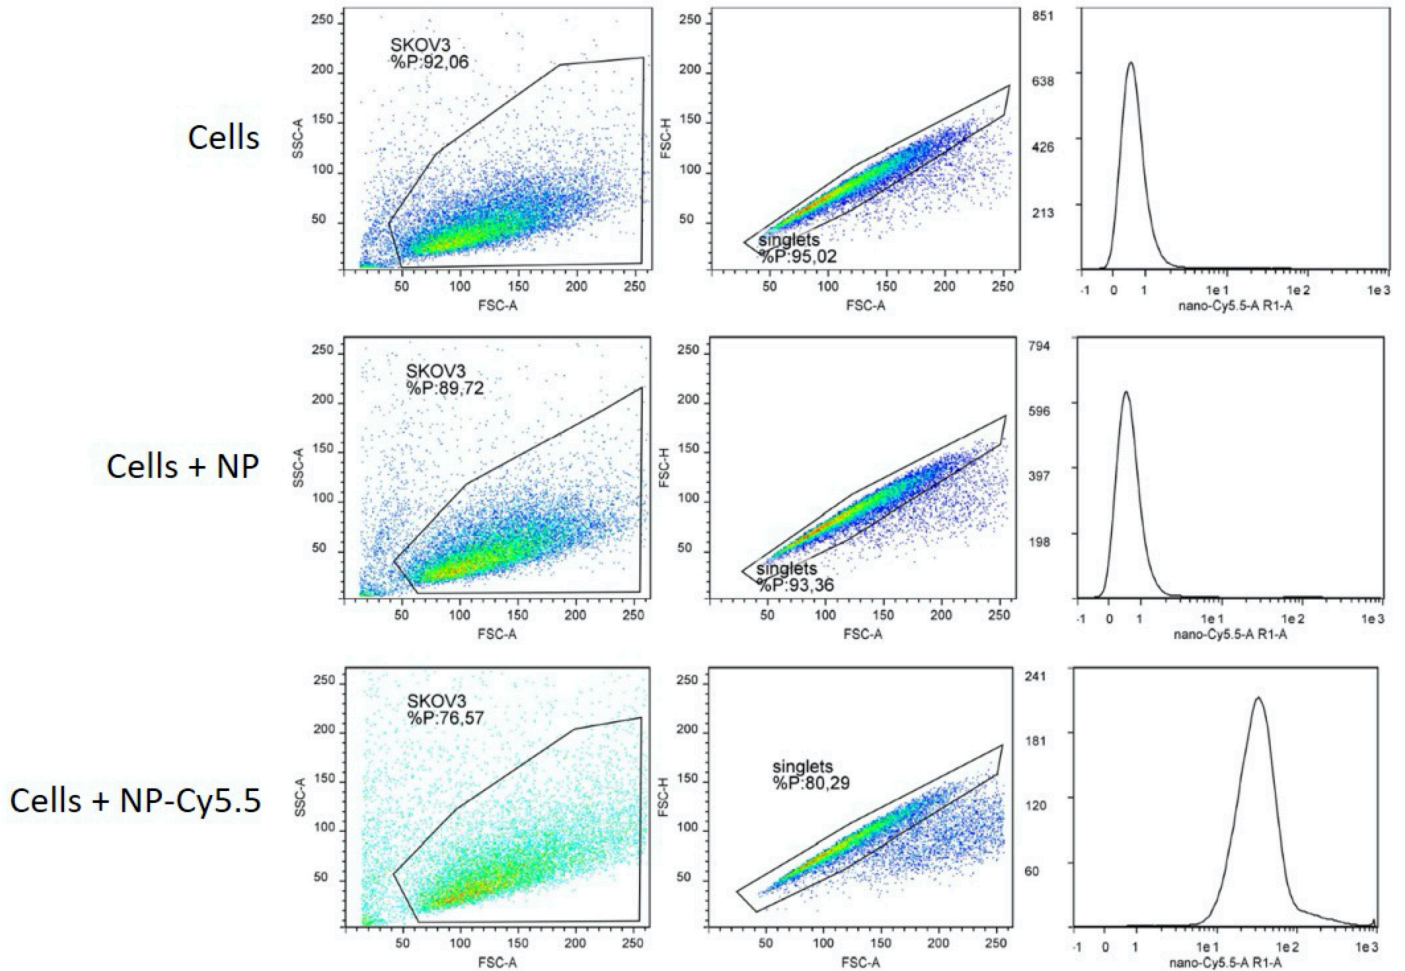

Supplementary Figure 2

# Cisplatin 10Nm and 30Nm

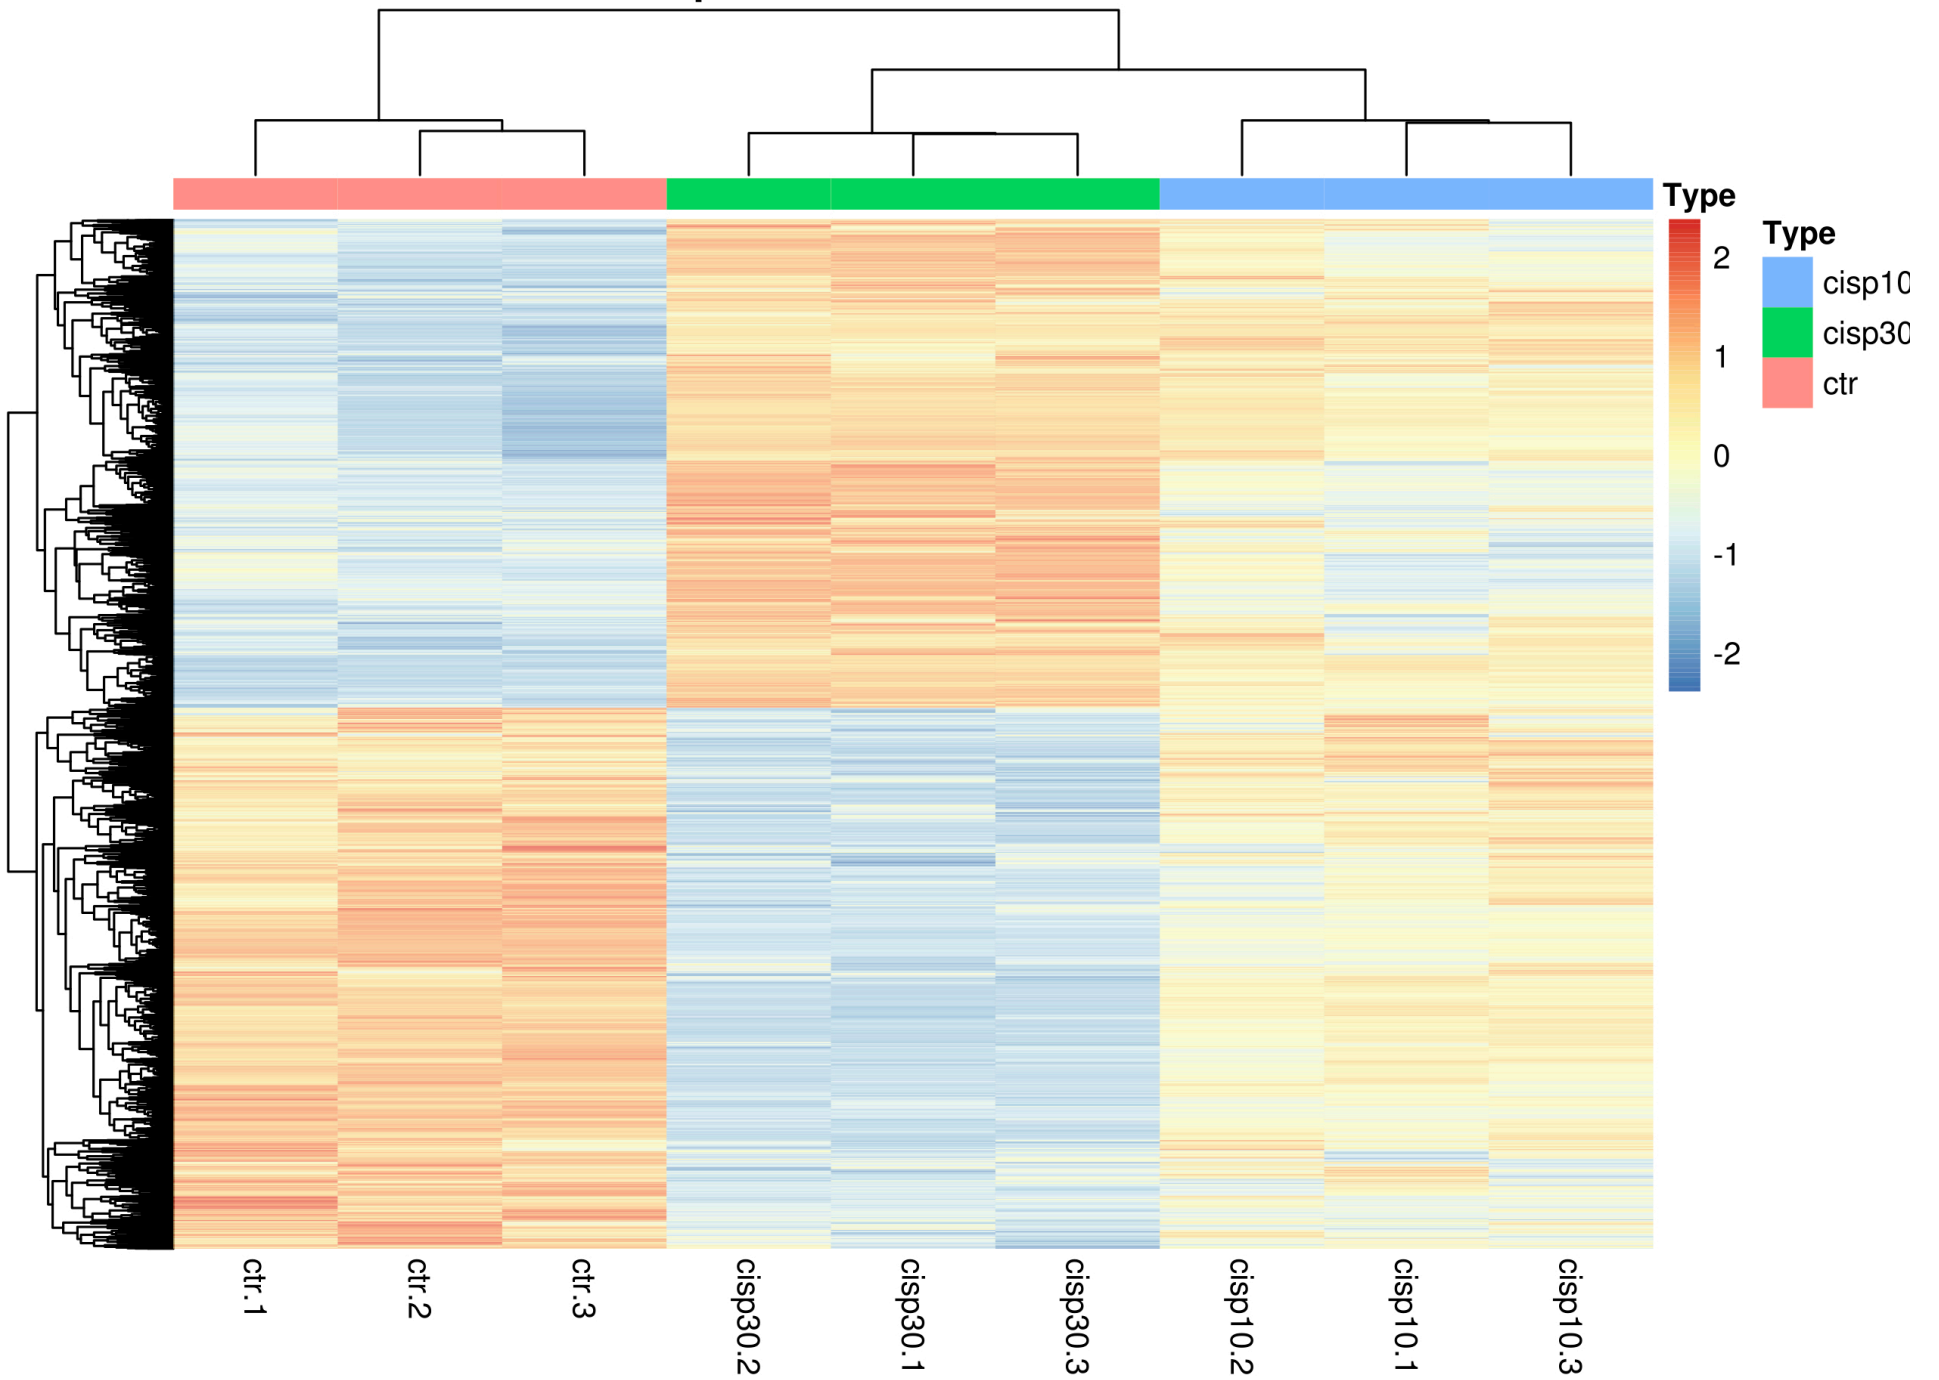

Supplementary Figure 3

# Nanoparticles Cisplatin 10Nm and 30Nm

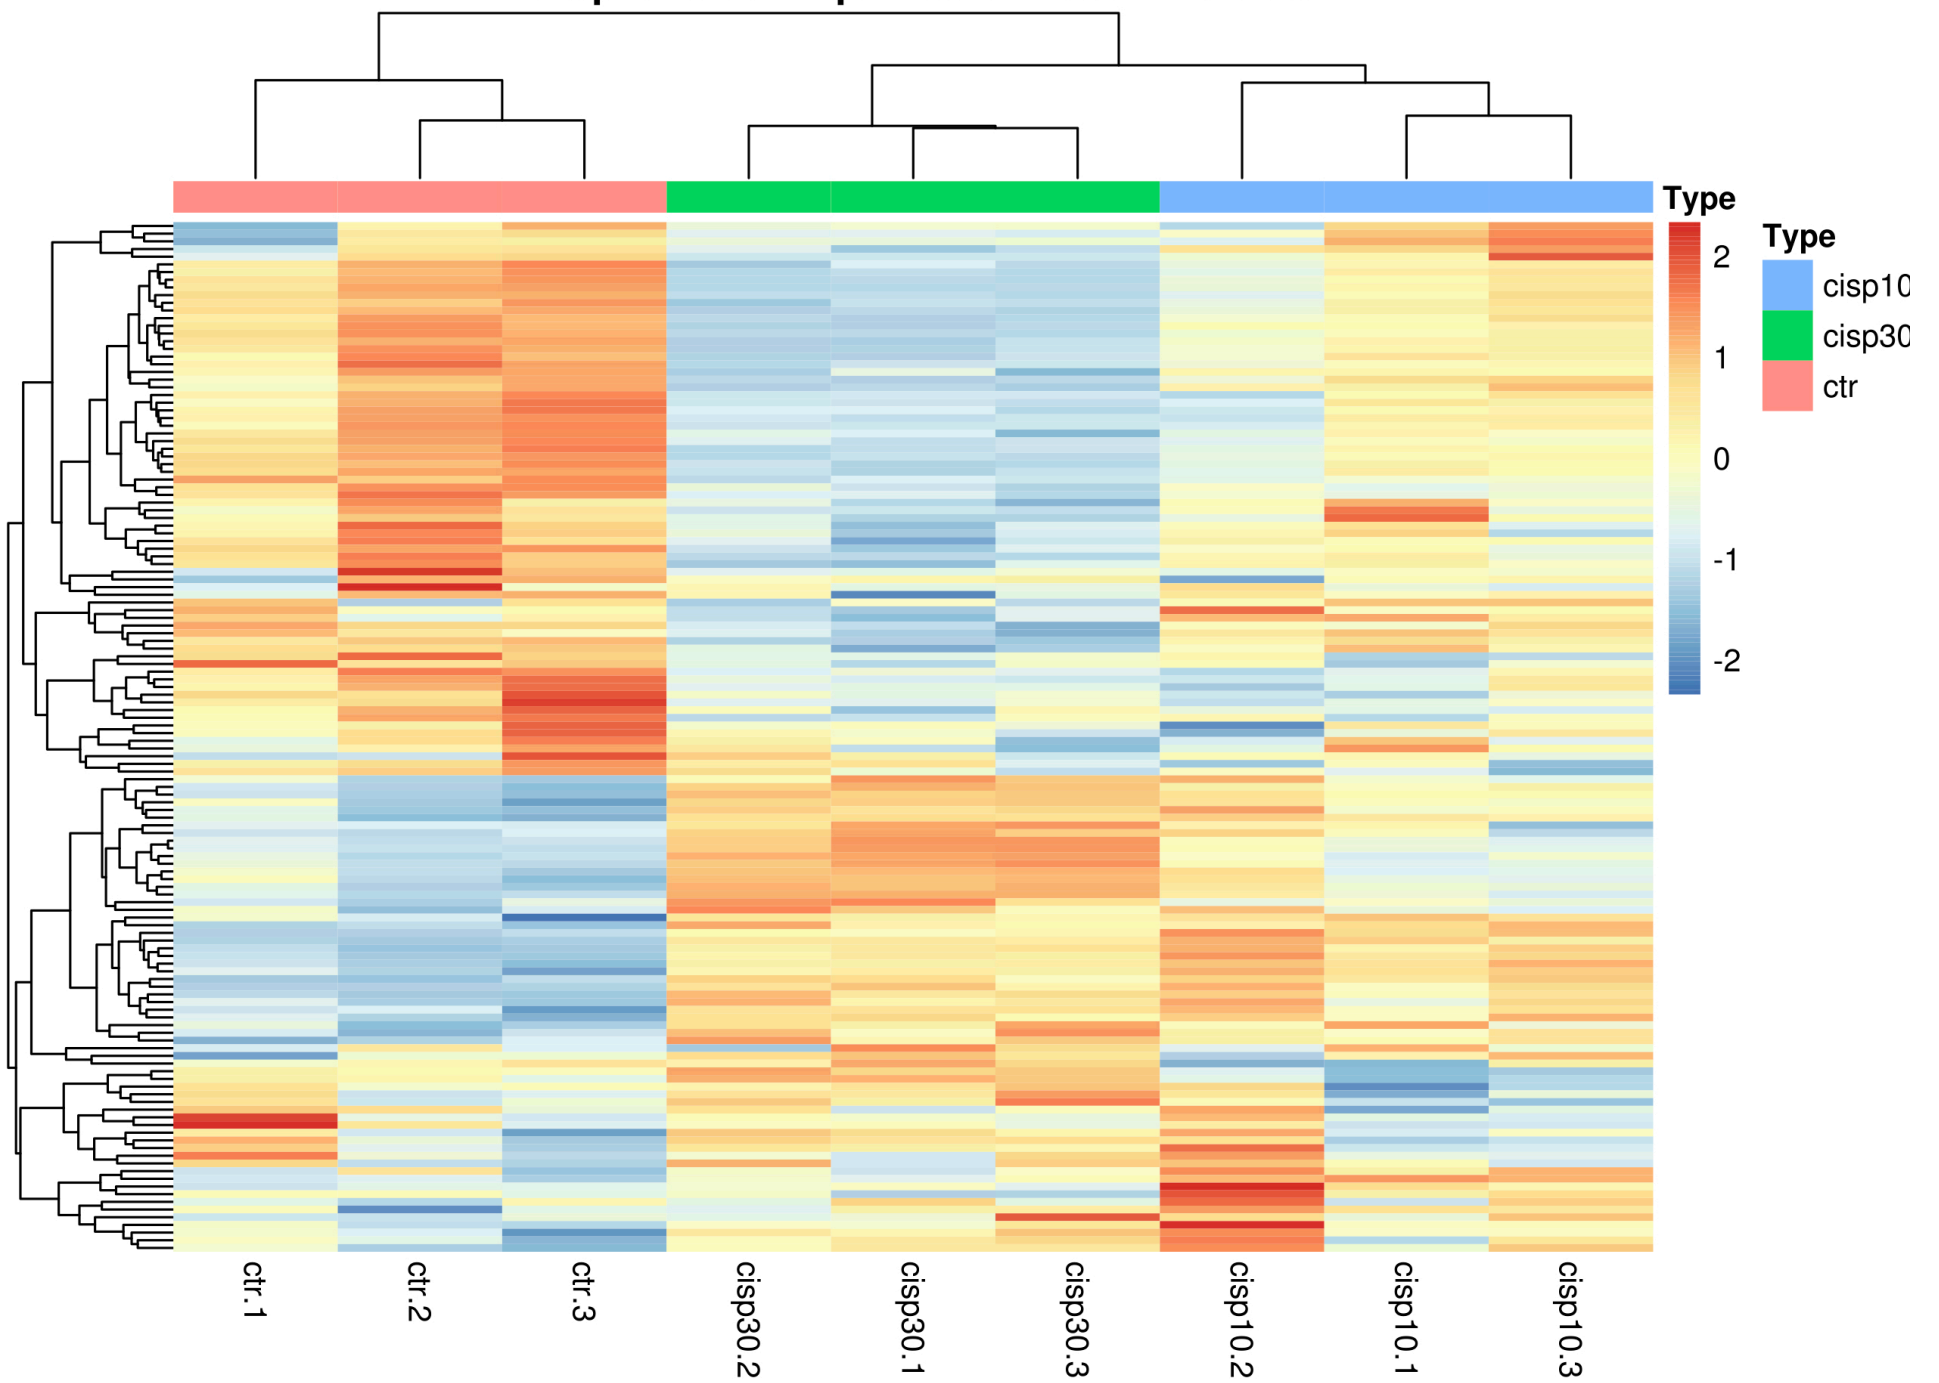

Supplementary Figure 4

**a** Intraperitoneal nodule

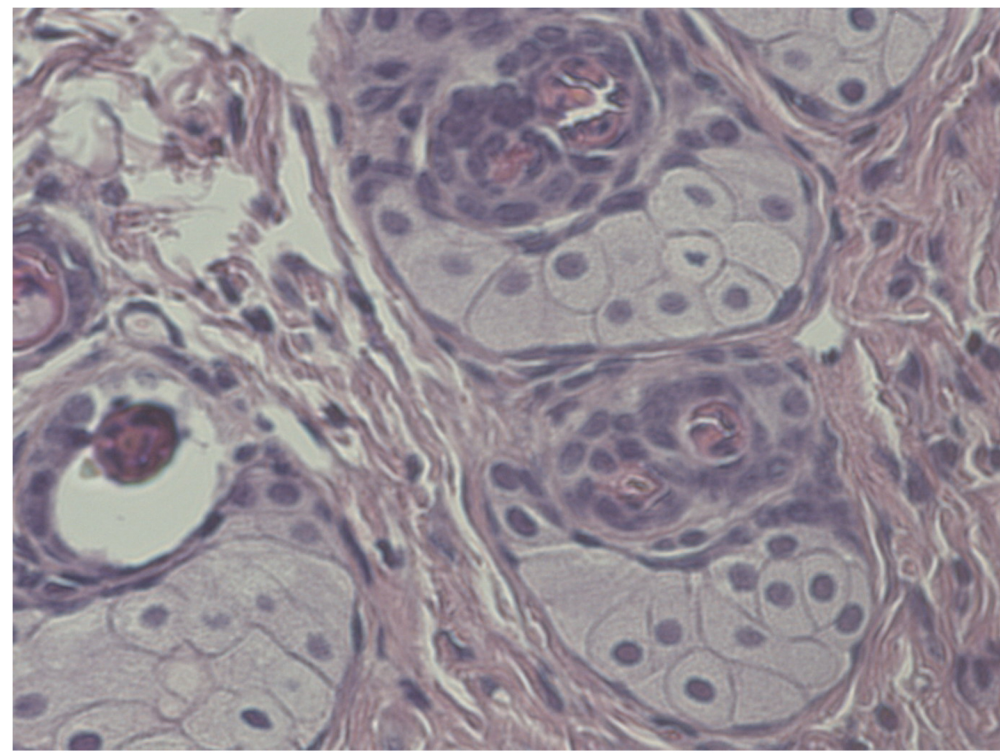

Hematoxylin and eosin

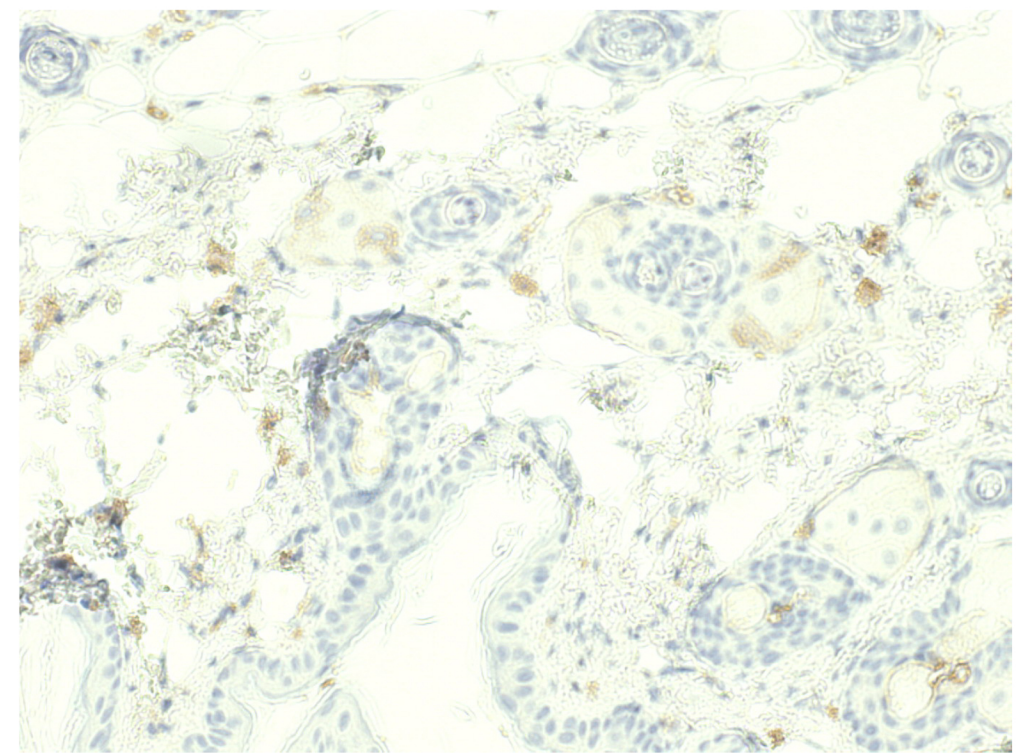

E-cadherin

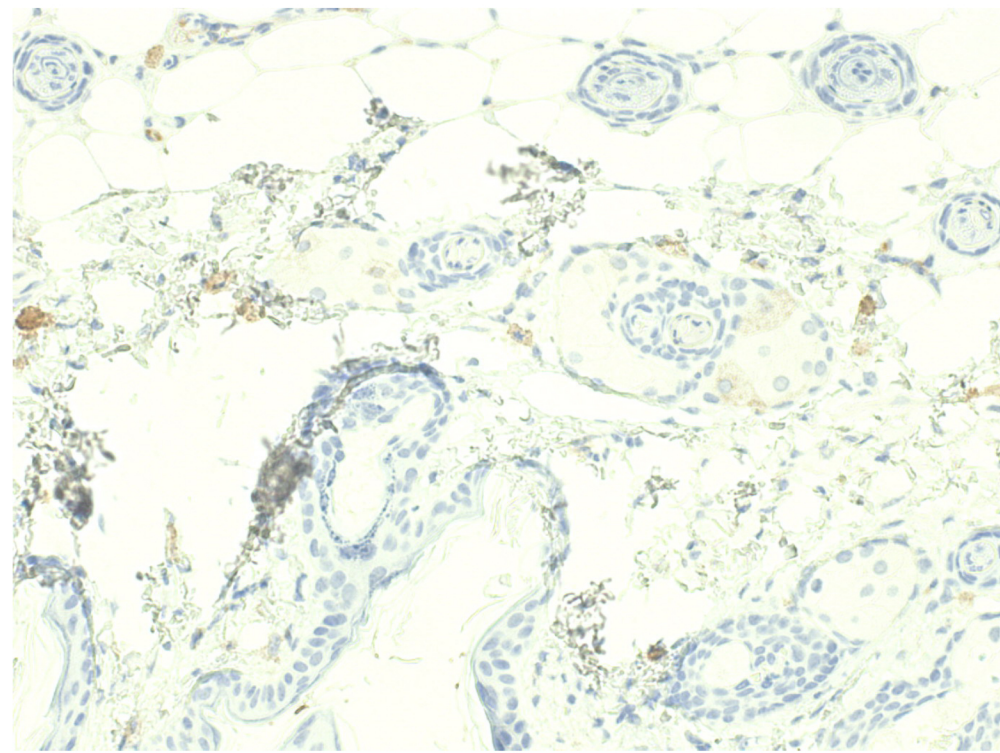

Vimentin

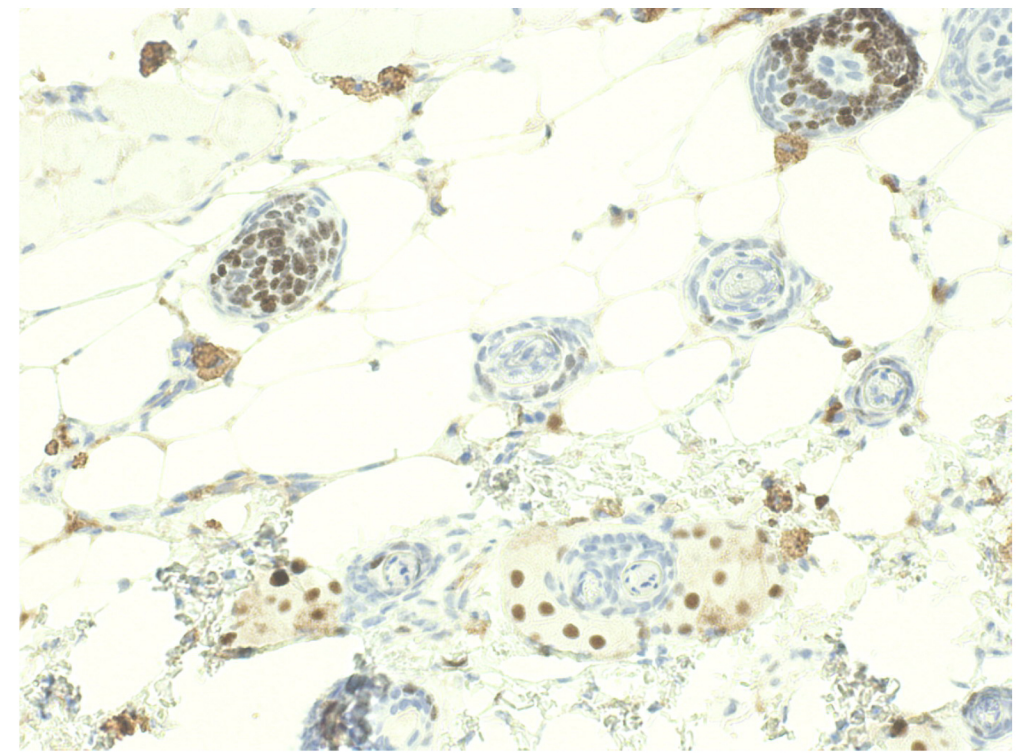

Ki67

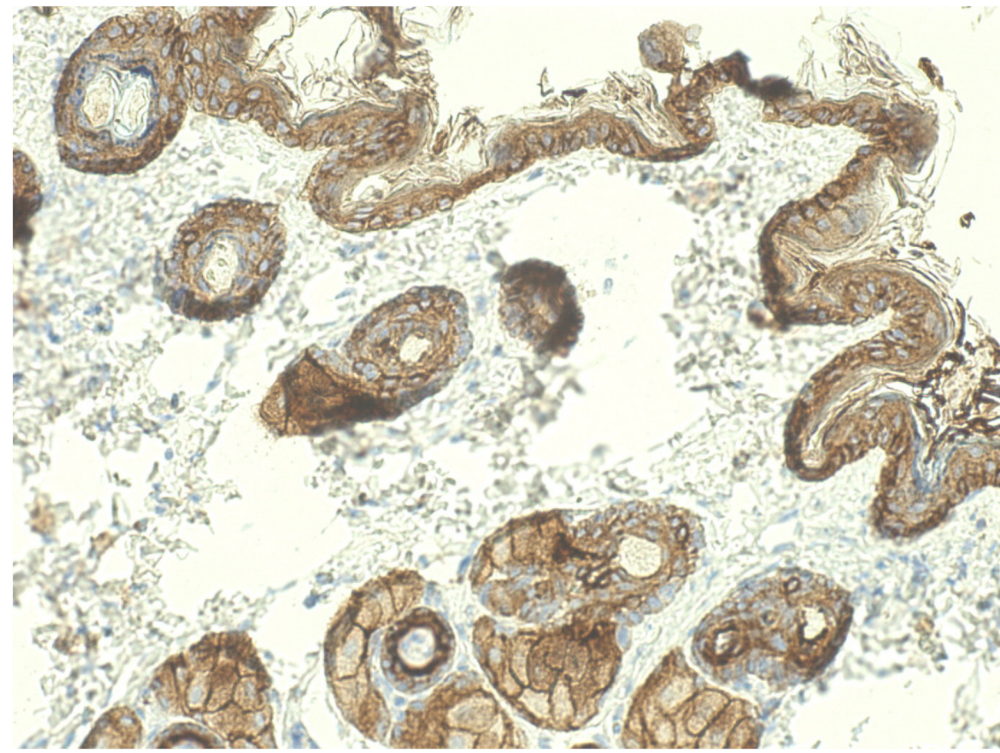

MCK

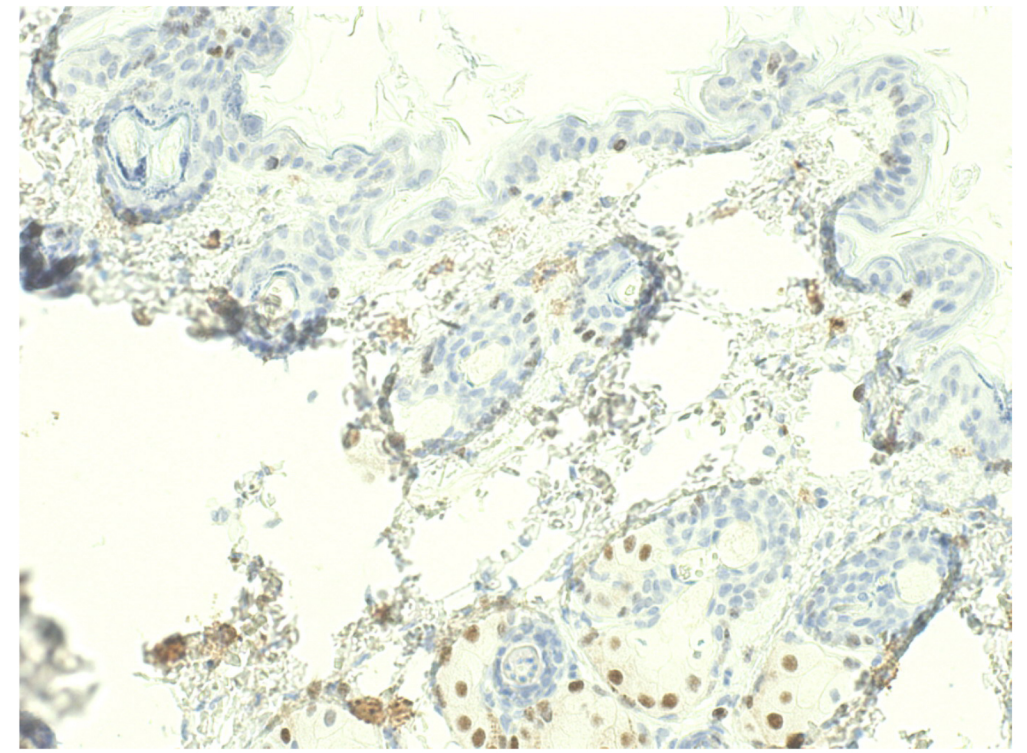

Ki67

**b** Tumor mass in the *omentum* (Hematoxylin and eosin)

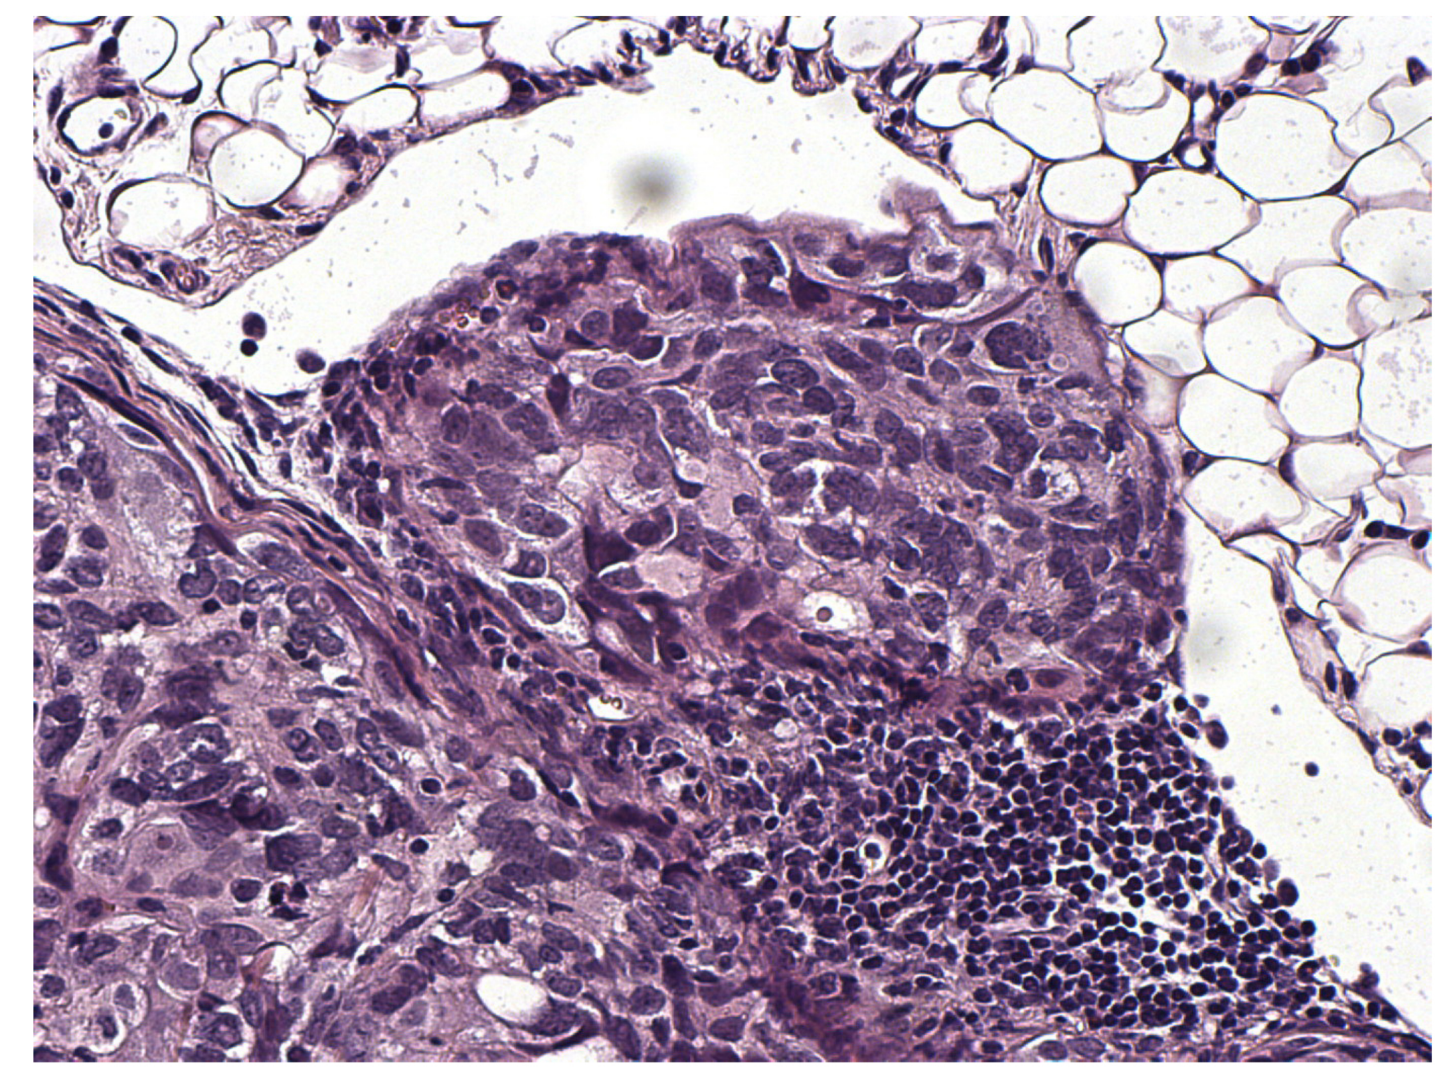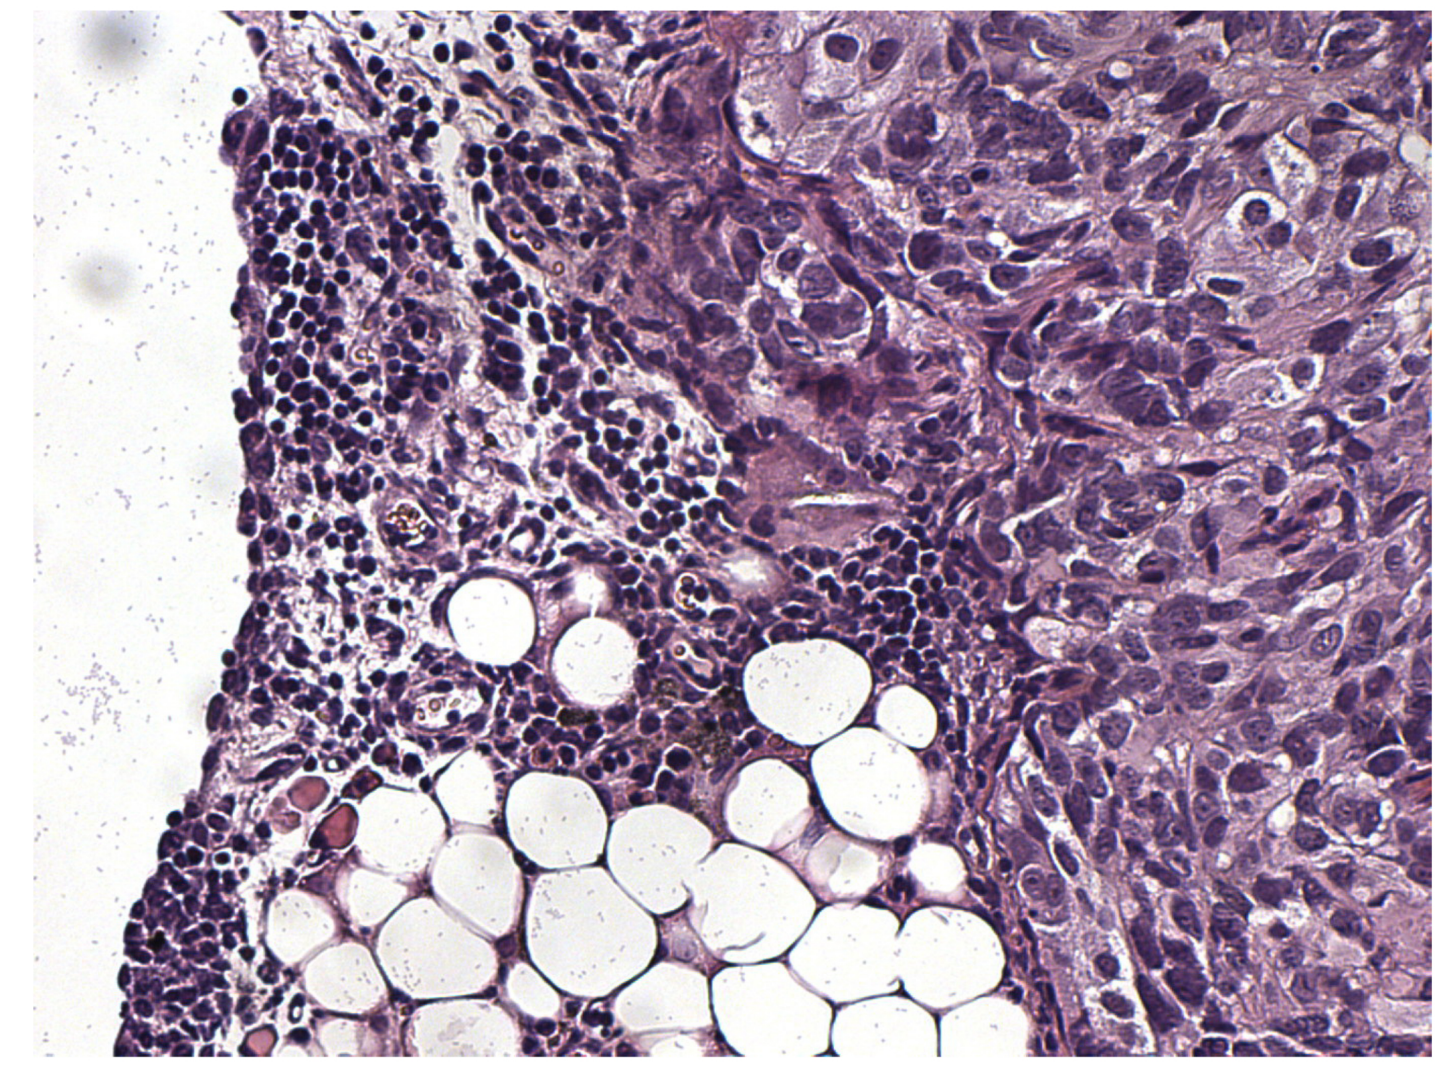

Supplement: Supplementary file 1 [file get_supplementary_file.php]
